# Supplementary material
Source: PubMed Central journal article supplement (PMC2993380)
Supplement: 1007698107_pnas.201007698SI.pdf [file 1007698107_pnas.201007698SI.pdf]

# Supporting Information

Hassan et al. 10.1073/pnas.1007698107

## Human and Mouse miR-23a~27a~24-2 Cluster Promoter

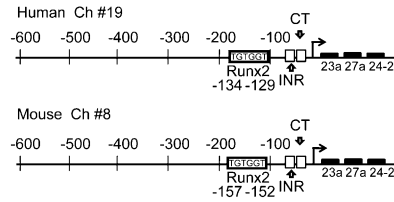

**Fig. S1.** Schematic of the human and mouse miR-23a~27a~24-2 cluster promoter. Representation of the  $-0.639$ -kb miR-23a~27a~24-2 cluster promoter fragment and chromosome location for human and mouse. Transcription factor (TRANSFAC; TESS) analysis of the proximal promoter identified a Runx binding site (TGTGGT;  $-129$  to  $-134$  for mouse,  $-152$  to  $-157$  for human) which is bound by Runx2 in osteoblasts. Two other important motifs, the INR (Initiator; CCCACCTCC) motif and the CT motif in sequence at  $-56$  to  $-34$ , were characterized in the proximal miR-23a~27a~24-2 cluster promoter (1, 2).

1. Lee Y, et al. (2004) MicroRNA genes are transcribed by RNA polymerase II. *EMBO J* 23:4051–4060.
2. Zhou X, Ruan J, Wang G, Zhang W (2007) Characterization and identification of microRNA core promoters in four model species. *PLoS Comput Biol* 3:e37.



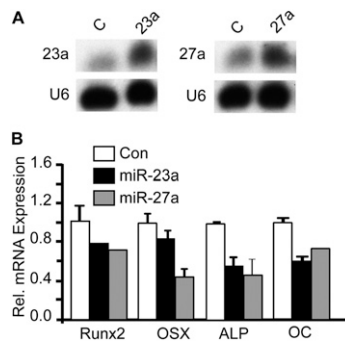

**Fig. S3.** Expression of cluster miRNAs 23a and 27a inhibit differentiation of MC3T3-E1 cells. (A) Northern blot showing levels of lentiviral-mediated over-expressed miR-23a and -27a in preosteoblast MC3T3-E1 cells at day 7. (B) The mRNA expression of osteoblast-specific marker genes. Transcription factors Runx2 and Osterix, ALP, and osteocalcin are represented as markers of early and late osteoblastogenesis.

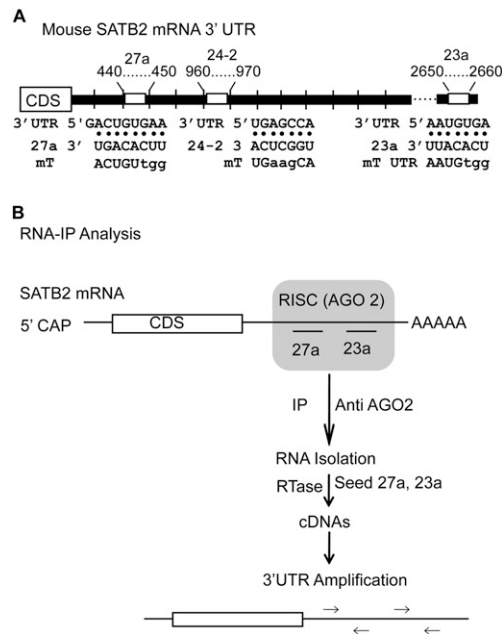

**Fig. S4.** RNP-IP analysis for in vivo cellular binding of the miR-23a and -27a to SATB2. (A) Schematic illustration of the 3' UTR of SATB2 mRNA with target sequences of each miR. Three putative target sites of miR-23a, -27a, and -24-2 were predicted in SATB2 mRNA by TargetScan, HOCTAR, and miRanda programs. Lowercase nucleotides indicate the mutations in the seed sequence of respective miR binding. (B) SATB2 3' UTR and RNP-IP strategy. The miR-silencing complex from MC3T3-E1 polysomal extract was immunoprecipitated with anti-argonaute (Ago2) antibody. cDNAs were made from immunoprecipitated RNA using miR-23a and -27a seed sequences. The miR-23a and -27a binding to SATB2 3' UTR were validated by PCR using primers (arrows) derived from the upstream and downstream sequences of the binding site (Table S1).

**Table S1. Nucleotide sequences of primers and probes used for qPCR, ChIP, EMSA, and Northern blot**

| Type                                     | Real-time qPCR primers (5'-3')                                                                     |
|------------------------------------------|----------------------------------------------------------------------------------------------------|
| <b>Bone marker genes</b>                 |                                                                                                    |
| Runx2                                    | F: CGG CCC TCC CTG AAC TCT<br>R: TGC CTG CCT GGG ATC TGT A                                         |
| ALP                                      | F: CCA ACT CTT TTG TGC CAG AGA<br>R: GGC TAC ATT GGT GTT GAG CTT TT                                |
| BSP                                      | F: CAG GGA GGC AGT GAC TCT TC<br>R: AGT GTG GAA AGT GTG GCG TT                                     |
| OC                                       | F: CTG ACA AAG CCT TCA TGT CCA A<br>R:GCG CCG GAG TCT GTT CAC TA                                   |
| OSX                                      | F: ATG GCG TCC TCT CTG CTT G<br>R: TGA AAG GTC AGC GTA TGG CTT                                     |
| Col1A1                                   | F: GCT CCT CTT AGG GGC CAC T<br>R: CCT TTGTCA GAA TAC TGA GCA GC                                   |
| <b>Precursor miRNA</b>                   |                                                                                                    |
| miR-23a                                  | F: TTT GAT GCC AGT CAC AAA TCA CAT TG                                                              |
| miR-27a                                  | F: GTC GTG TTC ACA GTG GCT AAG                                                                     |
| miR-24-2                                 | F: CAC TGG CTC AGT TCA GCA GG                                                                      |
| <b>Mature miRNA</b>                      |                                                                                                    |
| miR-23a                                  | ATC ACA TTG CCA GGG ATT TCC                                                                        |
| miR-27a                                  | TTC ACA GTG GCT AAG TTC CGC                                                                        |
| miR-24-2                                 | TGG CTC AGT TCA GCA GGA ACA G                                                                      |
| <b>Chromatin IP</b>                      |                                                                                                    |
| Murine promoter                          | miR cluster ChIP primers (5'-3')<br>F: TAG AGG AGG GCT AGG GTG TG<br>R: GCT TGC CTG CCT ATC TTG AC |
| Rat promoter                             | F: CCT CCC GAT CTC ACT TTC CT<br>R: GCA CAG GGT TCA GTT GGA AAT                                    |
| <b>EMSA (Runx2 site in miR promoter)</b> |                                                                                                    |
| WT                                       | Gel shift primers (5'-3')<br>CTT AAA CTG TGt gtg gtG AGGTGT ACC                                    |
| miR MT                                   | CTT AAA CTG TGt gta ctG AGGTGT ACC                                                                 |
| <b>Control</b>                           |                                                                                                    |
| GAPDH                                    | Control primers (5'-3')<br>F: AGG TCG GTG TGA ACG GAT TTG<br>R: TGT AGA CCA TGT AGT TGA GGT CA     |
| U6                                       | F: CGC TTC GGC AGC ACA TAT AC<br>R: AAA ATA TGG AAC GCT TCA CGA                                    |
| <b>Northern probes</b>                   |                                                                                                    |
| Mouse/rat miR-23a                        | Primers (5'-3')<br>GGAAATCCCTGGCAATGTGAT                                                           |
| Mouse/rat miR-27a                        | GCGGAACTTAGCCACTGTGAA                                                                              |
| Mouse/rat miR-24-2                       | CTGTTCCCTGCTGAACTGAGCCA                                                                            |
| <b>RIP-ChIP primers</b>                  |                                                                                                    |
| Mmu satb2 3'UTR (23a)                    | F: CTTGCCAGATCTTTGCGAAT<br>R: GGGAAAATTGTGCTTTGTCAAG                                               |
| Mmu satb2 3'UTR (27a)                    | F: TCGACCATAGTAATTCTAGTCACG<br>R: CACACTTGACAGTTCCTTCA                                             |
| miR-23a SEED                             | CAATGTGAA                                                                                          |
| miR-27a SEED                             | ACTGTGAA                                                                                           |
| <b>siRNAs (Qiagen)</b>                   |                                                                                                    |
| Mouse Runx2 siRNA                        | 5'-r(UGC CUC UGC UGU UUG AAA) d(TT)-3')                                                            |
| NS siRNA                                 | 5'-r(UUC UCC GAA CGU GUC ACG U) dTdT-3'                                                            |
